# Supplementary material
Source: PubMed Central journal article supplement (PMC3243609)
Supplement: emboj2011398s1.pdf [file emboj2011398s1.pdf]

**Dupont et al.**

## **Supplementary methods**

### **Quantitative real time RT-PCR**

Total RNA was extracted from BMM and cDNA was synthesized using a Cells-to-Ct Kit (Applied Biosystems), according to the manufacturer's instructions. Real-time PCR was performed using SYBR Green Master Mix (Applied Biosystems), and products were detected on a Prism 5300 detection system (SDS, ABI/Perkin-Elmer). The relative extent of IL-1 $\beta$  expression was calculated using the  $2^{-\Delta\Delta C(t)}$  method. The results presented herein are from three independent experiments, each of which was performed in duplicate. Conditions for real time PCR were: initial denaturation for 10 min at 95°C, followed by 40 amplification cycles with 15s at 95°C and 1 min at 60°C. The sequences of the primers (IDT DNA Technologies, MA) were as follows: HPRT1 forward 5- GGA GCG GTA GCA CCT CCT -3; HPRT1 reverse 5- CTG GTT CAT CAT CGCTAATCA C -3; IL-1 $\beta$  reverse 5- TCT TCT TTG GGT ATT GCTTGG -3; IL-1 $\beta$  forward 5- TGT AAT GAA AGA CGG CAC ACC -3

### **Extracellular LDH release assay**

Lactate dehydrogenase (LDH) release was measured using a cytotoxicity detection kit (Promega, Madison, WI). All LDH data are means  $\pm$  standard error of the mean (s.e.m).

## **Supplementary discussion**

Some of the nuclear staining with IL-1 $\beta$  in BMMs (e.g. in Suppl. Figs. S3 and S4) may be nonspecific, but we cannot rule out functional roles (a topic beyond the scope of our study). IL-1 family members such as IL-1 $\alpha$  and IL-1 $\beta$  are known to be distributed between the cytoplasm and the nucleus, reflecting their dual functionality or to counter excessive inflammation (Luheshi et al, 2009a). Of further note is that IL-1 $\beta$  has been observed in the nucleus of microglia, a major macrophage cell type of the central nervous system (Luheshi et al, 2009b).

## **Supplementary references**

Luheshi NM, Rothwell NJ, Brough D (2009a) Dual functionality of interleukin-1 family cytokines: implications for anti-interleukin-1 therapy. *Br J Pharmacol* **157**: 1318-1329

Luheshi NM, Rothwell NJ, Brough D (2009b) The dynamics and mechanisms of interleukin-1alpha and beta nuclear import. *Traffic* **10**: 16-25

## **Supplementary figures**

**Suppl. Fig. S1. A.** Atg5<sup>fl/fl</sup> Cre<sup>-</sup> and Atg5<sup>fl/fl</sup> Cre<sup>+</sup> BMM were induced for autophagy by starvation in EBSS (Starv) or not (Full) for 1 h. Total cell extracts were analyzed by

immunoblotting. **B.** LPS-pretreated BMM were stimulated with 20  $\mu$ M nigericin (Nig) for 1 h with or without co-treatment with the mTor catalytic inhibitor pp242. IL-1 $\beta$  secretion was measured by ELISA. **C.** Bone marrow-derived macrophages (BMM), pretreated with 100 ng/ml LPS overnight to induce pro-IL-1 $\beta$  expression, were exposed to Alum (250  $\mu$ g/ml) for 2 h with autophagic induction by starvation (Starv) in EBSS or were incubated in full medium (Full), and secreted IL-1 $\beta$  assayed. Data, means  $\pm$  s.d. ( $n \geq 3$ ); \*,  $p < 0.05$ . **D.** LPS-pretreated BMM were stimulated with 1 or 5  $\mu$ M amyloid- $\beta$  peptide fibrils (A $\beta$ ) for 2 h with or without autophagic induction by starvation and IL-1 $\beta$  secretion measured. **E.** BMM were transfected with scramble (Scr) control siRNA or siRNAs against ASC, NLRP3 or GRASP55. After 48 h following transfection, cells were treated overnight with LPS and IL-1 $\beta$  mRNA levels were quantified by real-time RT-PCR and internally normalized with respect to the *HPRT1* gene. Data, means  $\pm$  s.d. ( $n = 3$ ). †,  $p \geq 0.05$ . **F.** BMM were transfected with scrambled control siRNA (Scr) or siRNAs against ASC, NLRP3 or GRASP55. After 48 h following transfection, cells were treated overnight with LPS and pro-IL1 $\beta$  level assayed by immunoblots.

**Suppl. Fig. S2. A-B.** Bone marrow-derived macrophages (BMM), pretreated with 100 ng/ml LPS overnight to induce pro-IL-1 $\beta$  expression, were exposed to nigericin (20  $\mu$ M) for 20, 30 or 60 minutes with autophagic induction by starvation (Starv) in EBSS or were incubated in full medium (Full). IL-1 $\beta$  secretion (A) and LDH released (B) was measured by ELISA and by a cytotoxicity detection kit respectively. Data, means  $\pm$  s.e.m. ( $n \geq 3$ ); \*,  $p < 0.05$ . **C-D.** Bone marrow-derived macrophages (BMM), pretreated with 100 ng/ml LPS overnight to induce pro-IL-1 $\beta$  expression, were exposed to silica (250  $\mu$ g/ml) for 20, 30 or 60 minutes with autophagic induction by starvation (Starv) in EBSS or were incubated in full medium (Full). IL-1 $\beta$  secretion (C) and LDH released (D) was measured by ELISA and by a cytotoxicity detection kit respectively. Data, means  $\pm$  s.e.m. ( $n \geq 3$ ); \*,  $p < 0.05$ ; †,  $p \geq 0.05$ . **E.** BMM from *Atg5<sup>fl/fl</sup> Cre<sup>-</sup>* and *Atg5<sup>fl/fl</sup> Cre<sup>+</sup>* mice were pretreated overnight with 100 ng/ml LPS, stimulated for 1 h with the inflammasome agonist nigericin (20  $\mu$ M) in full medium (Full). Cell culture supernatants were assayed for murine IL-1 $\beta$ . Data, means  $\pm$  s.d. ( $n \geq 3$ ); \*,  $p < 0.05$ . **F.** as in E, assayed for IL-18. Data, means  $\pm$  s.d. ( $n \geq 3$ ); \*,  $p < 0.05$ .

**Suppl. Fig. S3. A.** Colocalization analysis of IL-1 $\beta$  with the basal autophagic machinery factor LC3. Fluorescence: LC3 (green, Alexa 488); IL-1 $\beta$  (red, Alexa568). BMM from GFP-LC3 knock-in mice were pretreated with 100 ng/ml LPS overnight, stimulated for 30 min with the inflammasome agonist nigericin (20  $\mu$ M) in full medium. BMM were prepared for immunofluorescence microscopy using fluorescently labeled antibodies against GFP and IL-1 $\beta$ . **B.** A line fluorescence tracing from images in A. **C.** Pearson's colocalization coefficients for IL-1 $\beta$  and LC3. Data, means  $\pm$  s.e.m. ( $n \geq 3$ ). **D.** LPS-pretreated BMM were starved (starv) for 1h with 20  $\mu$ M nigericin and cathepsin B inhibitor CA-074 Me (10  $\mu$ M) or with Bafilomycin A1 (Baf-100 nM). IL-1 $\beta$  mRNA levels were quantified by real-time RT-PCR, normalized with respect to the *HPRT1* gene, and presented as fold increases. Data, means  $\pm$  s.d. ( $n \geq 3$ ); †,  $p \geq 0.05$ .

**Suppl. Fig. S4. A.** Colocalization analysis of Rab8a with the basal autophagic machinery factor LC3 and IL-1 $\beta$ . Fluorescence; LC3 (green, Alexa488), IL-1 $\beta$  (red,

Alexa568), Rab8a (blue, Alexa633). BMM from GFP-LC3 knocking mice were pre-treated with LPS and stimulated for 30 min with 20  $\mu$ M nigericin in full medium. BMM were prepared for immunofluorescence microscopy. White arrows, triple colocalization. **B.** A line fluorescence tracing from images in A. **C.** Pearson's colocalization coefficients for IL-1 $\beta$  and Rab8a. **D.** BMM were transfected twice with scramble (Scr) control siRNA or siRNAs against Rab8a. After 48 h following transfection, cells were treated overnight with LPS and IL-1 $\beta$  mRNA levels were quantified by real-time RT-PCR, normalized with respect to the HPRT1 gene, and presented as fold increases. Data are means  $\pm$  SDV. **E.** Colocalization of Sec6 with LC3 and IL-1 $\beta$ . BMM from GFP-LC3 knock-in mice were pre-treated with LPS and analyzed by immunofluorescence microscopy. White arrows, triple colocalization (Sec6-IL-1 $\beta$ -LC3; turquoise arrows, LC3-Sec6 colocalization. **F.** Line tracing, fluorescence signal coincidence analysis. **G.** Pearson's colocalization coefficients for IL-1 $\beta$  and sec6. **H.** Colocalization analysis of Sec6 with LC3 and IL-1 $\beta$  (as in A). White arrows, triple colocalization. **I.** A line fluorescence tracing from images in H. **J.** Pearson's colocalization coefficients for IL-1 $\beta$  and sec6. Pearson's coefficients bars and error bars, means  $\pm$  s.d. (n=3).

**Suppl. Fig. S5. A,B.** BMM cells were transfected with siRNAs or scrambled (Scr) control siRNA. After 48 h of transfection, cells were treated with LPS and the day after subjected to 20  $\mu$ M nigericin in full medium, and secreted IL-1 $\beta$  (A) and IL-18 (B) were measured. Data, means  $\pm$  s.d. (n $\geq$ 3); \*, p<0.05. The number of cells in the experiment in panel A ( $2 \times 10^5$  cells) was 2.8 times higher than in Fig. 4A ( $0.7 \times 10^5$  cells). **C.** Effect of GRASP65 on autophagy induction by measuring LC3-II. BMM cells were transfected with GRASP65 or with GRASP65 and GRASP55 siRNAs or scramble (Scr) control. At 72 h post-transfection, cells were induced for autophagy, treated or not with Bafilomycin A1 (Baf) to inhibit autophagic degradation. All lanes are from the same gel (one intervening lane was removed to avoid redundancy).

**Suppl. Fig. S6.** Fluorescent confocal microscopy images: GM130 (green, Alexa488), GRASP55 (red, Alexa568). **A.** Control, resting BMM (). **B.** Nigericin, BMM treated with 20  $\mu$ M nigericin.

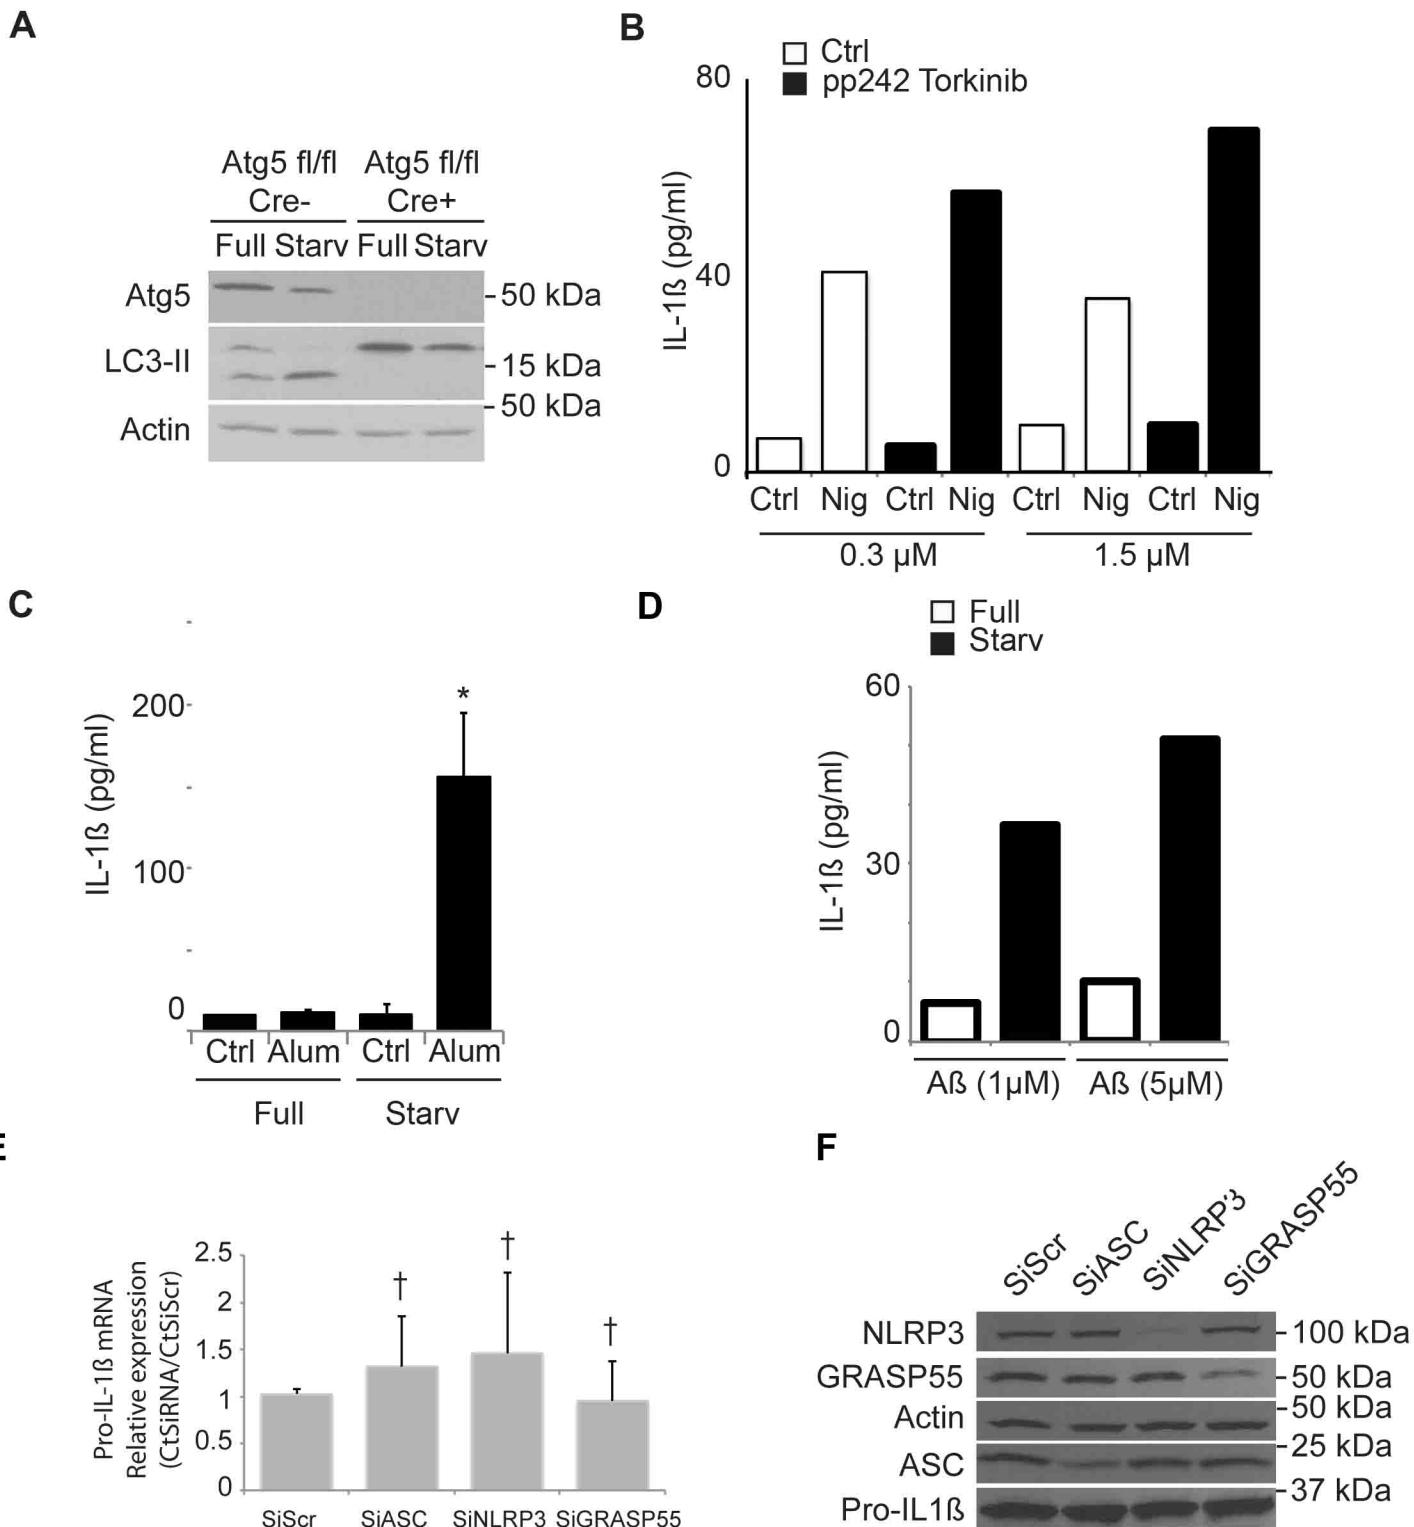

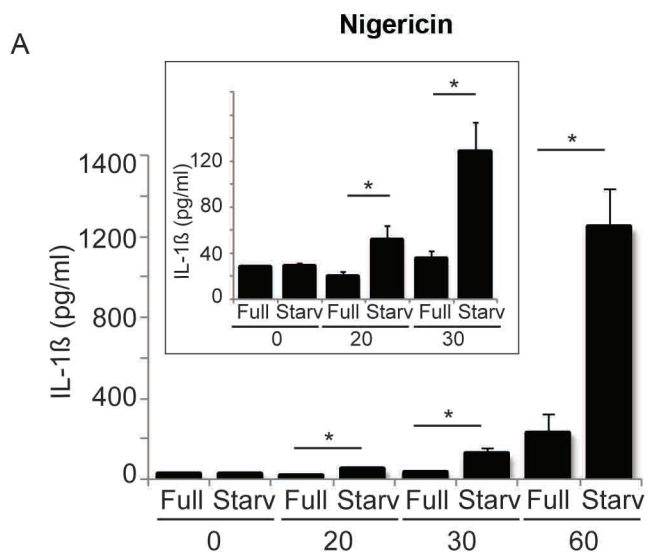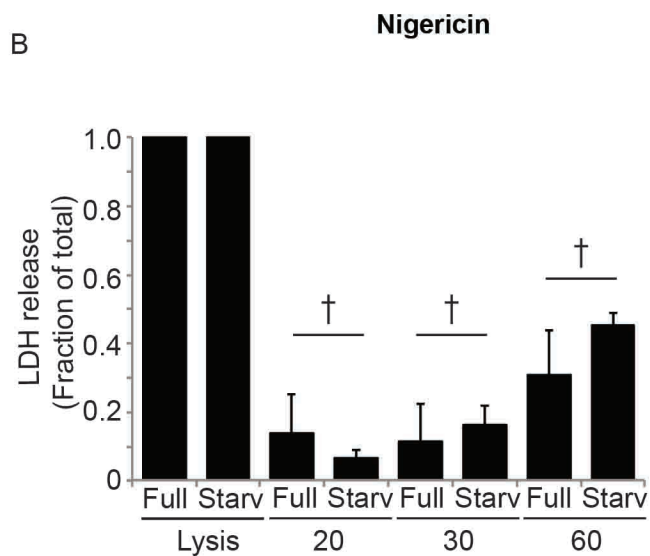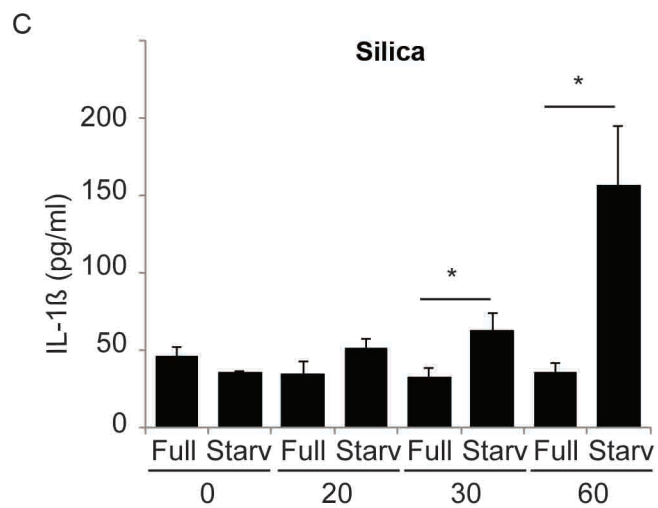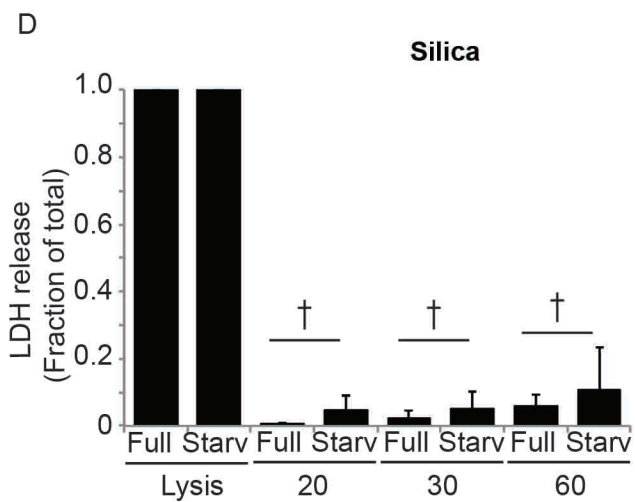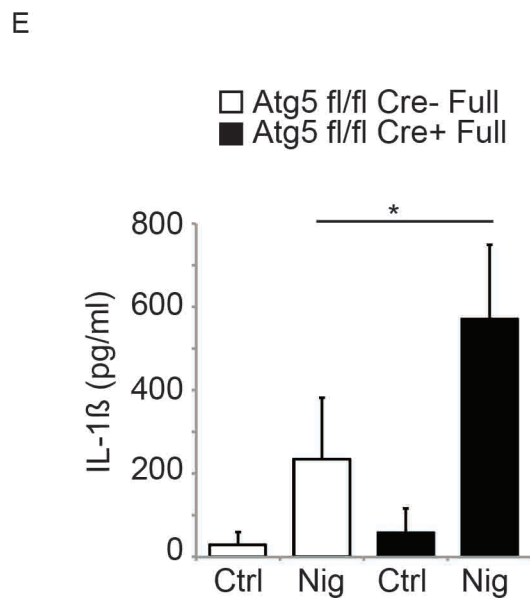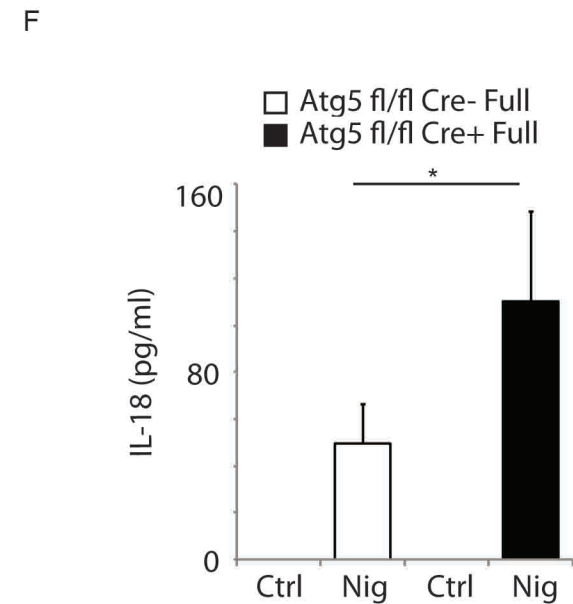

**A**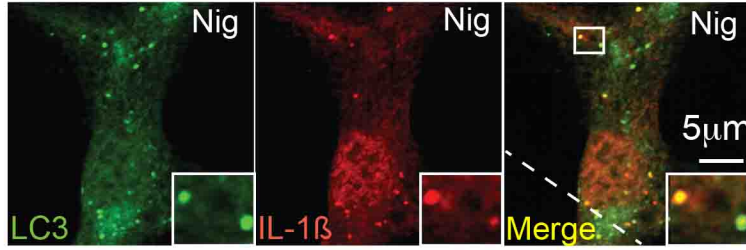**B**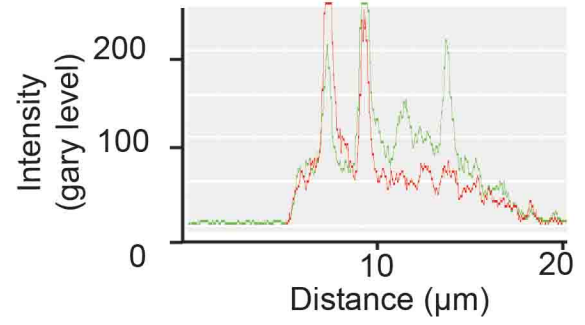**C**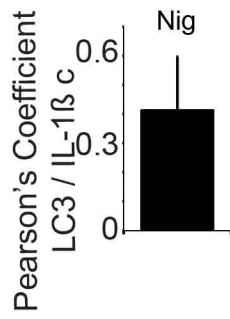**D**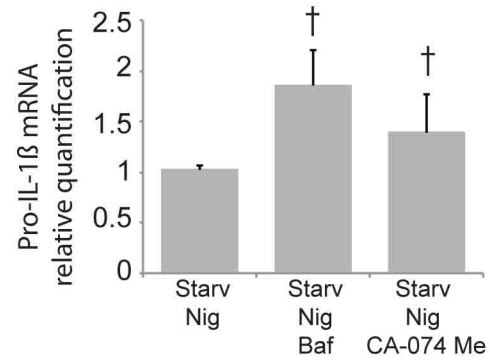

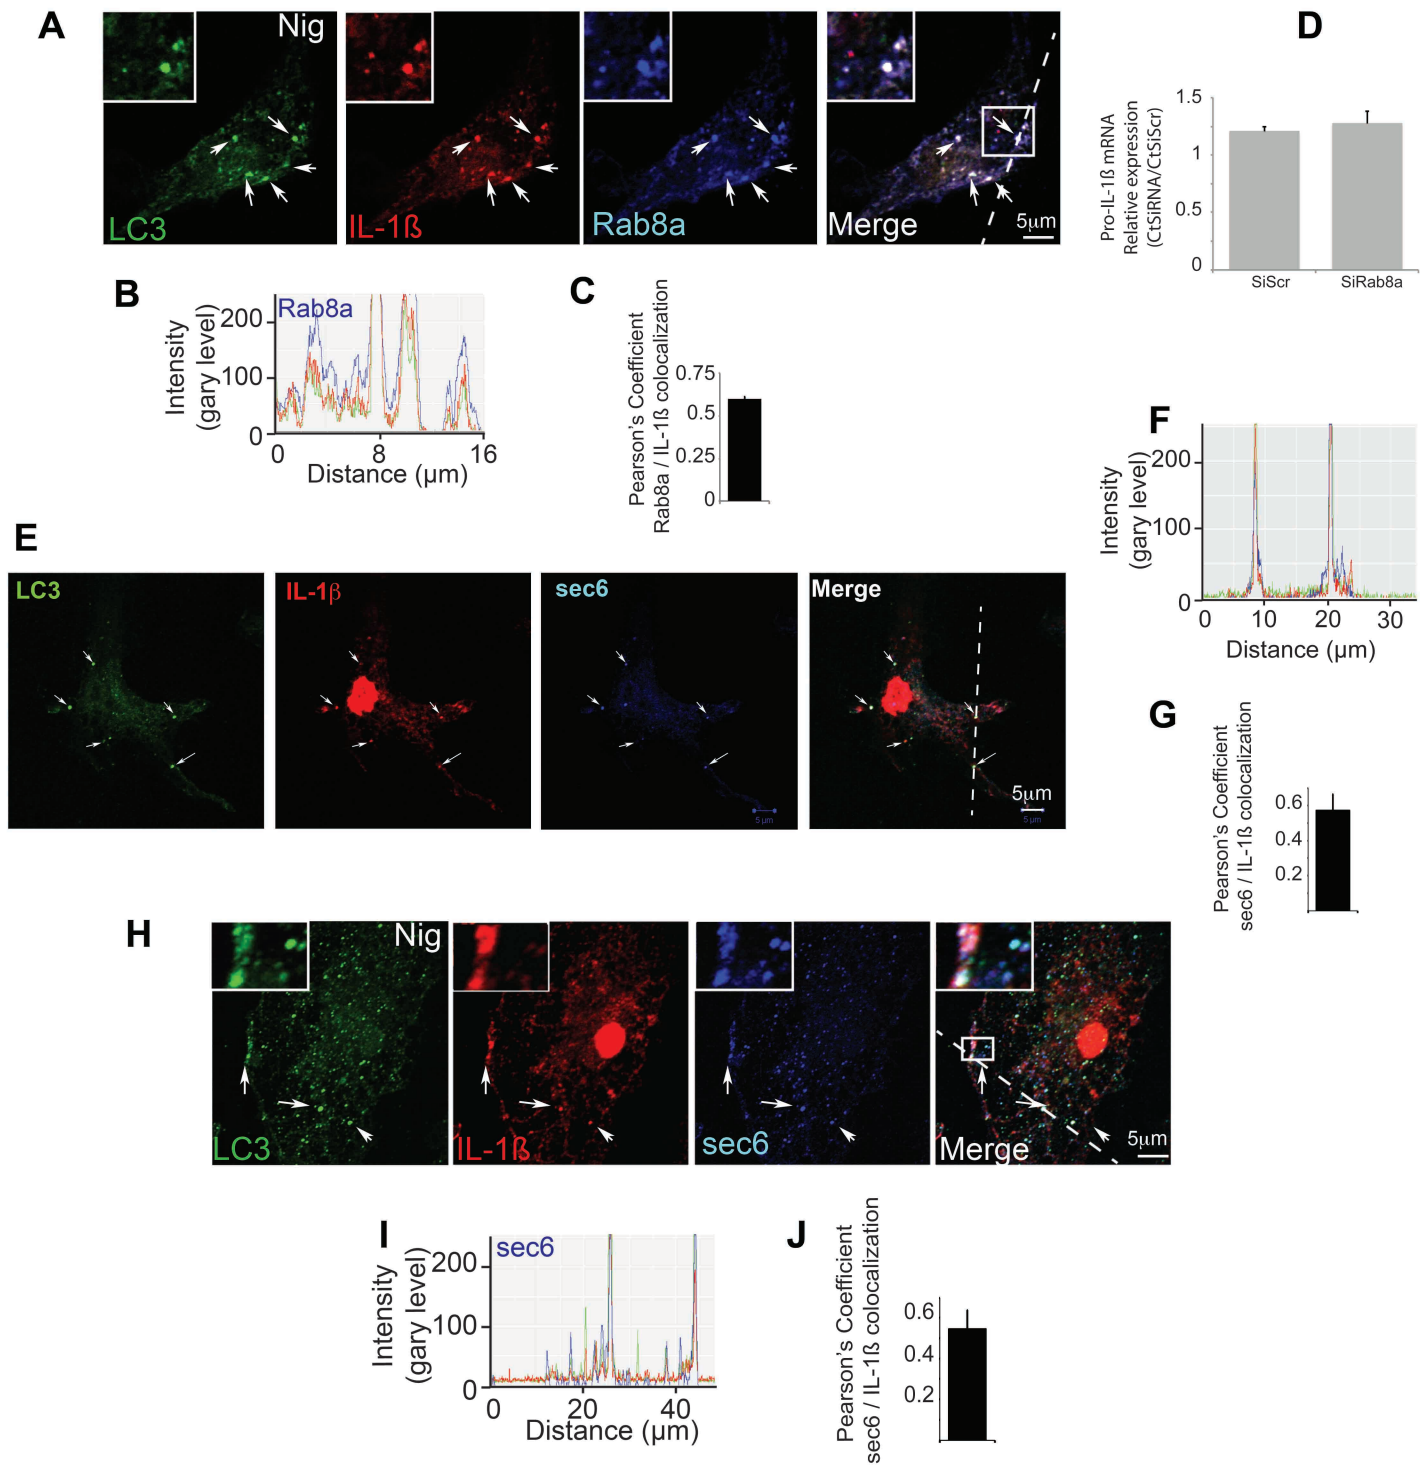

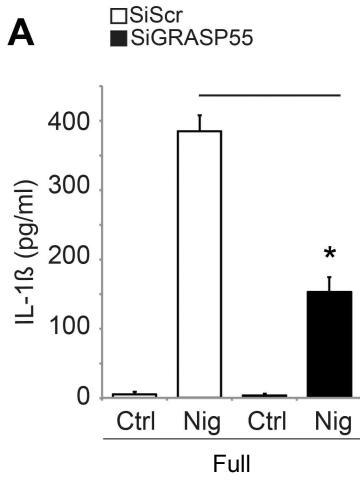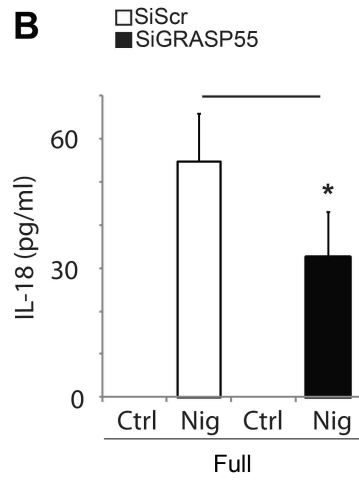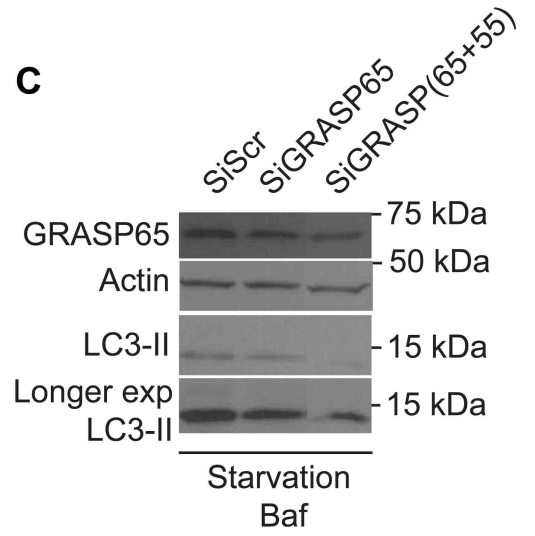

Suppl. Fig. S5



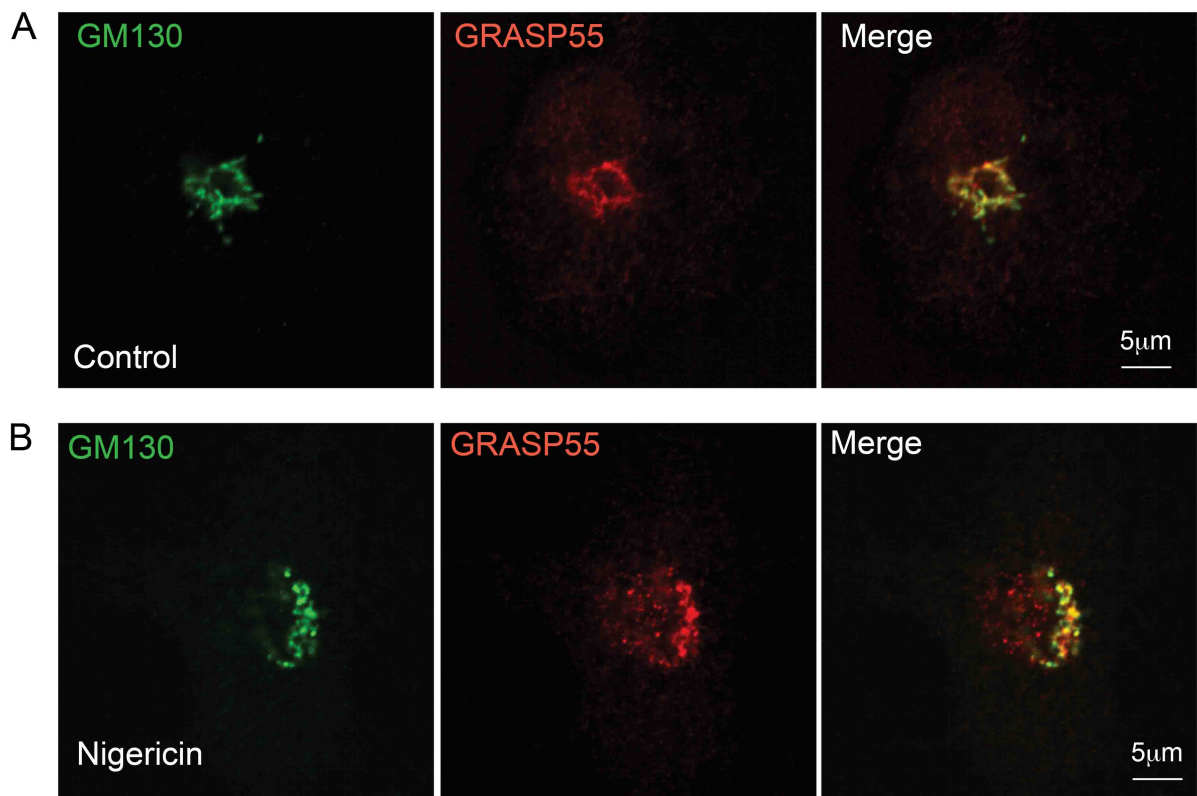

Suppl. Fig. S6
