# Supplementary material
Source: PubMed Central journal article supplement (PMC3243609)
Supplement: emboj2011398s2.pdf [file emboj2011398s2.pdf]

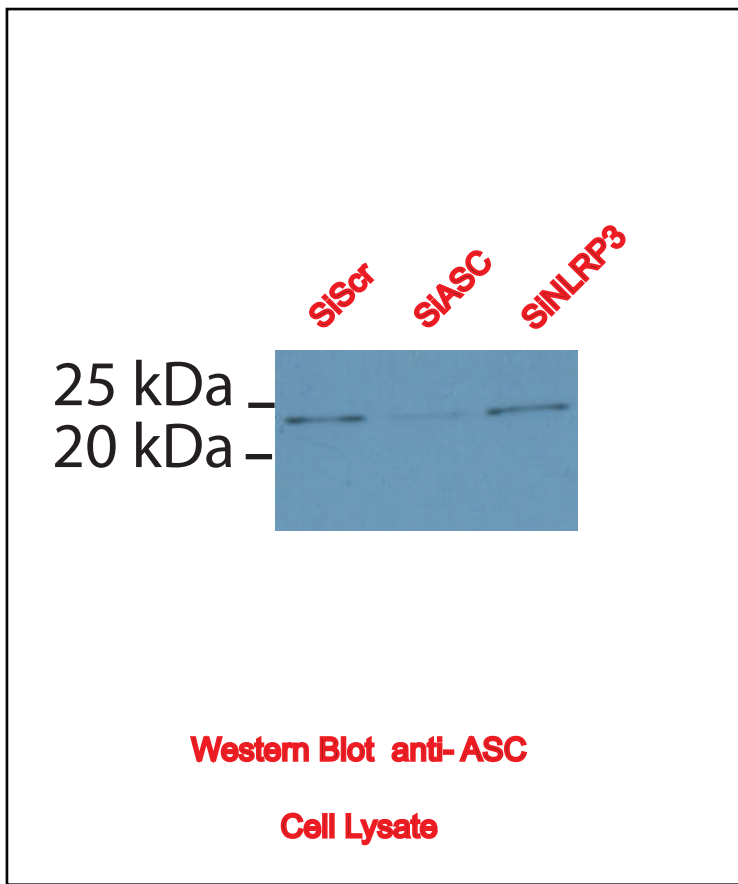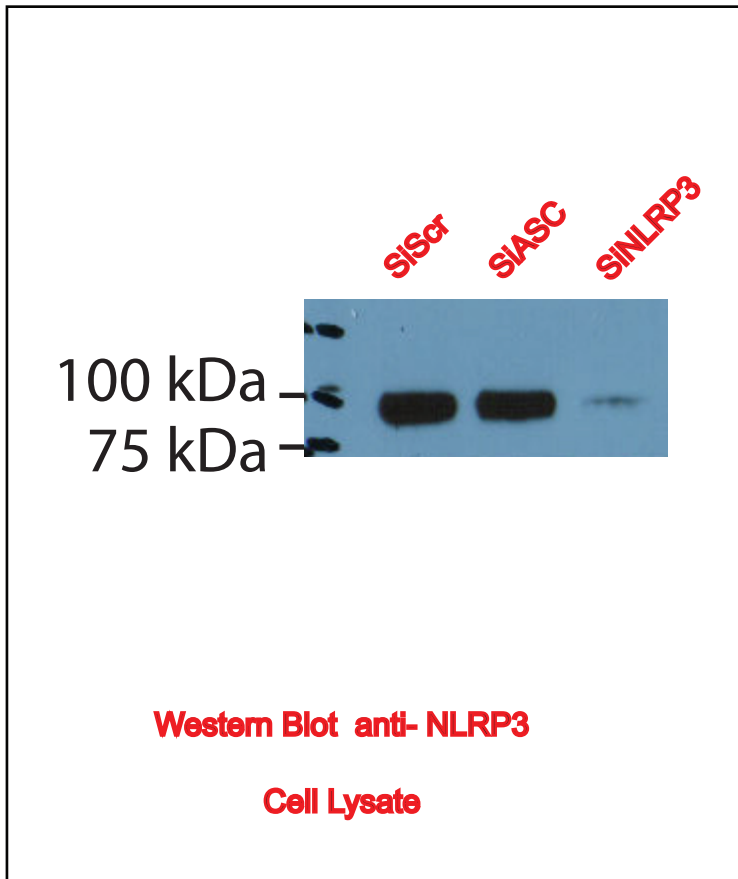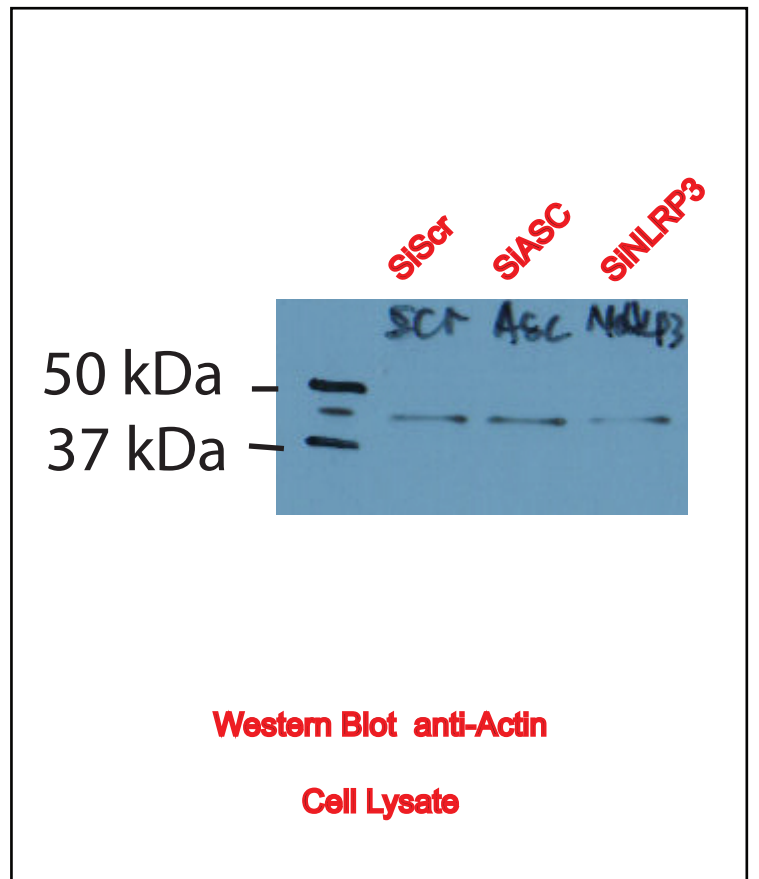

Figure 1G

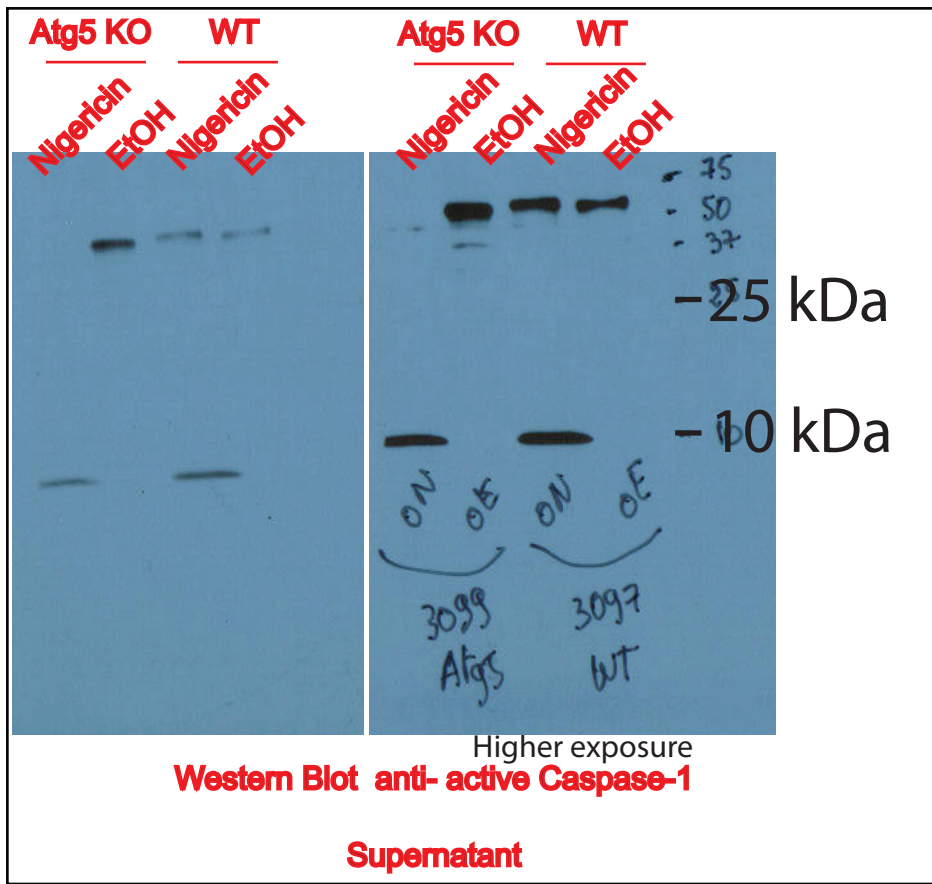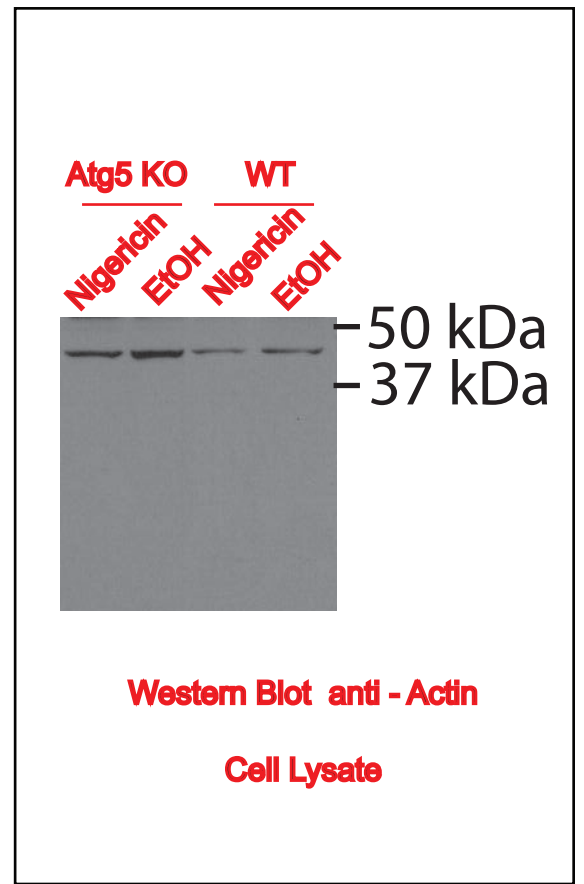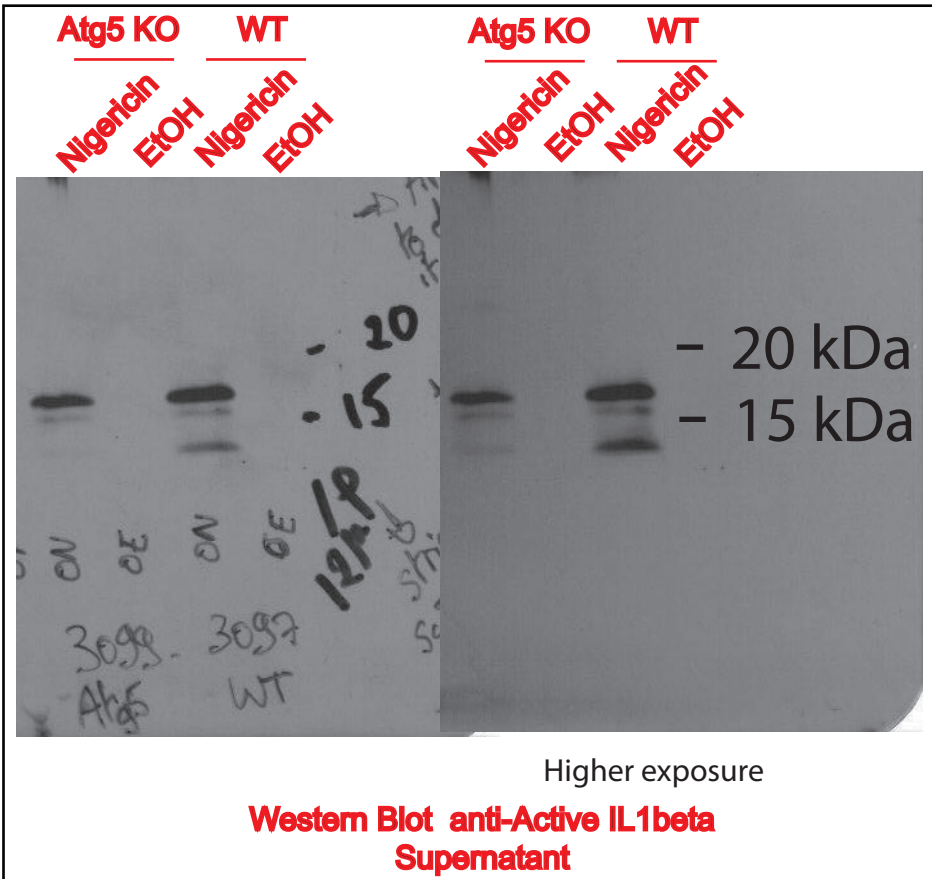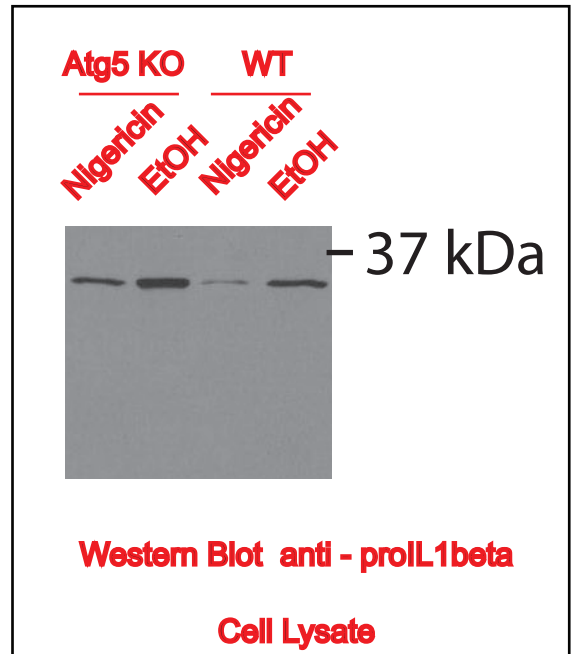

Figure 1B

Atg5 KO      WT  
 Nigericin    EtOH    Nigericin    EtOH

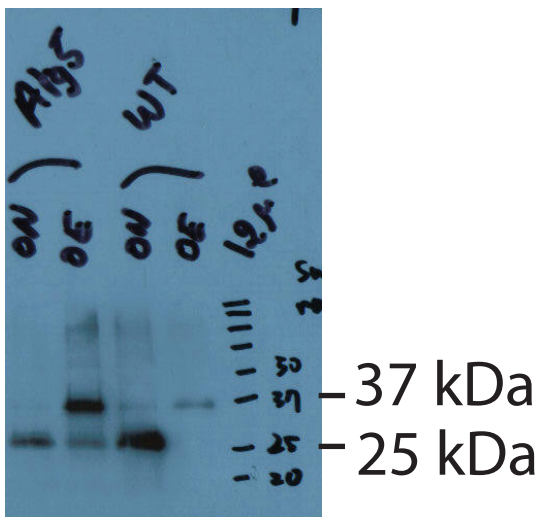

Western Blot anti- Cathepsin B  
 Supernatant

Atg5 KO      WT  
 Nigericin    EtOH    Nigericin    EtOH

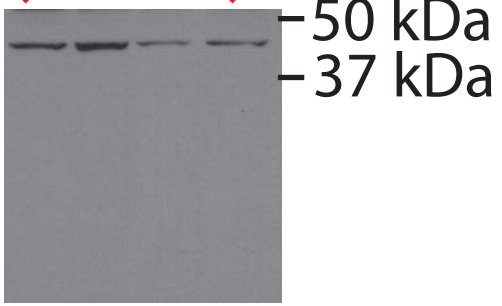

Western Blot anti - Actin  
 Cell Lysate

WT      Atg5 KO  
 EtOH    Nigericin    EtOH    Nigericin

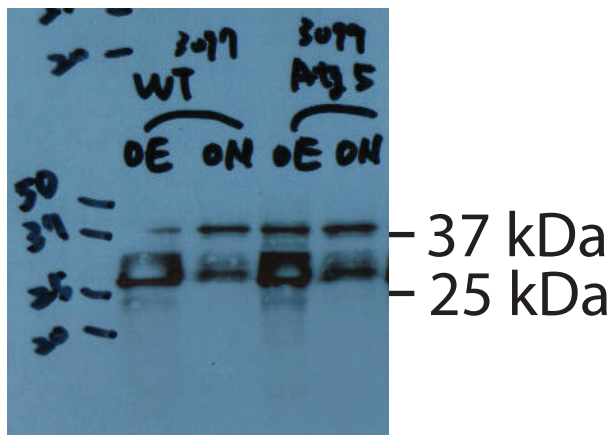

Western Blot anti- Cathepsin B  
 Cell Lysate

Figure 2G

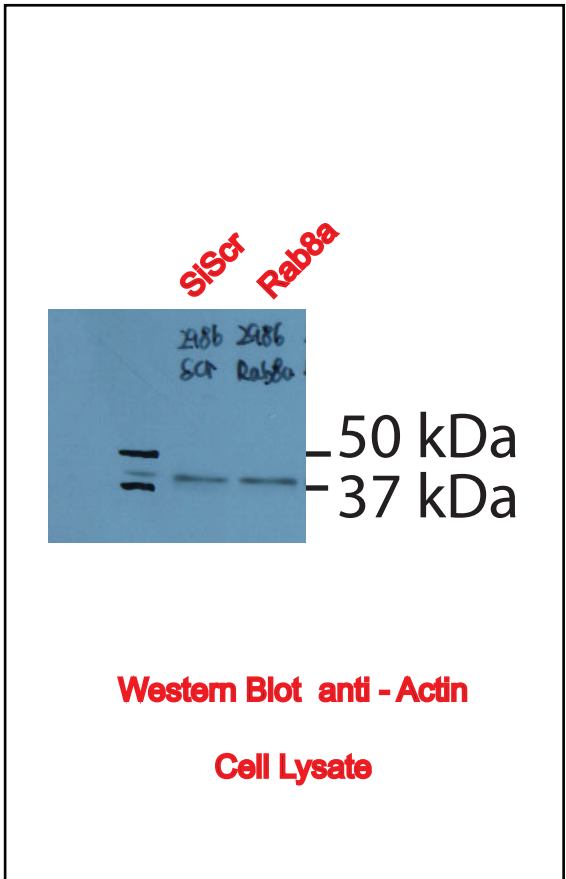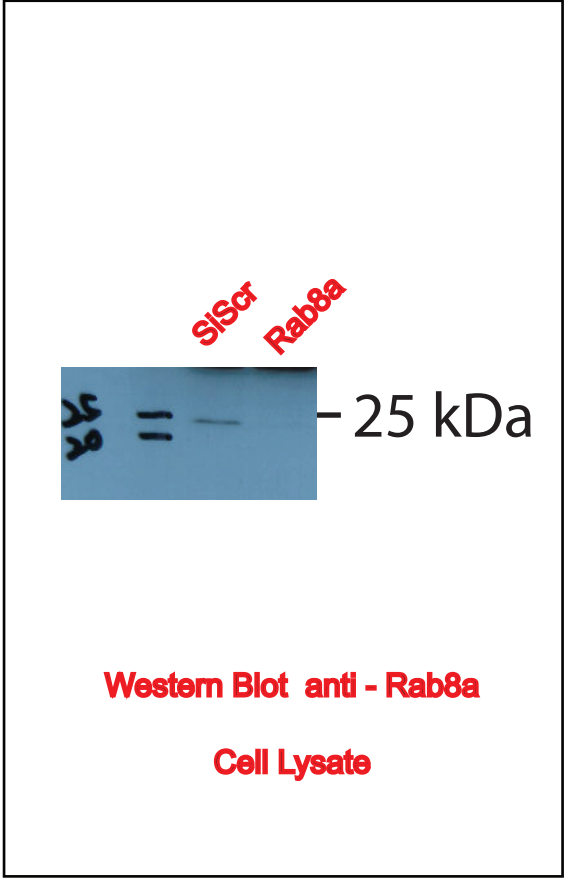

Figure 3E

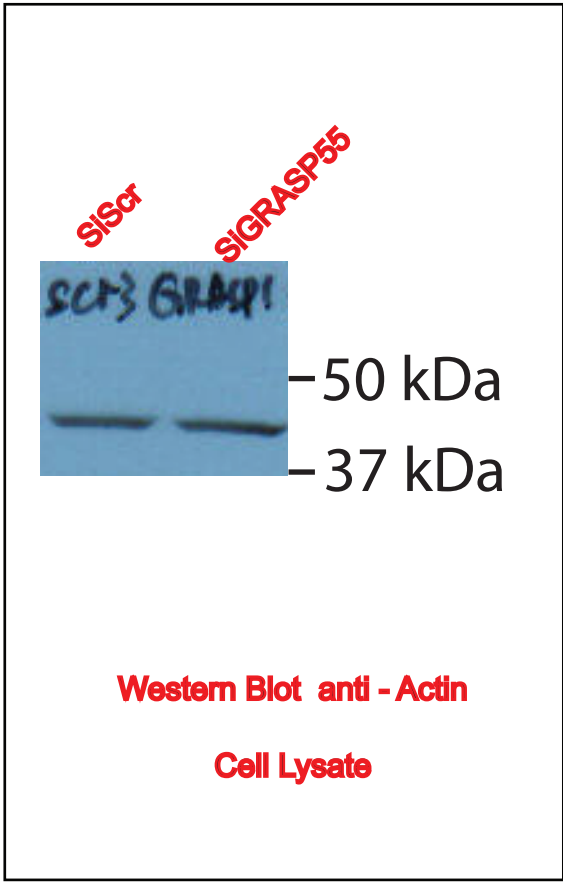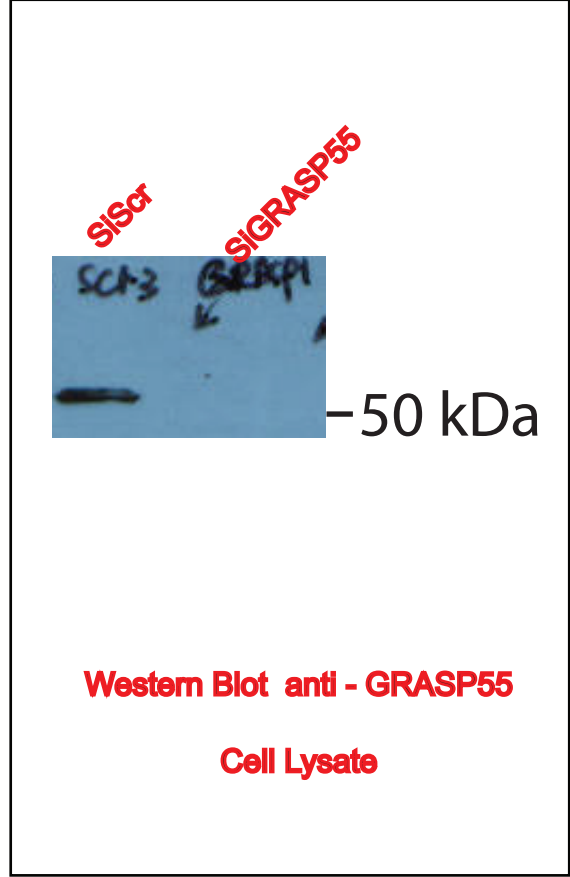

Figure 4A

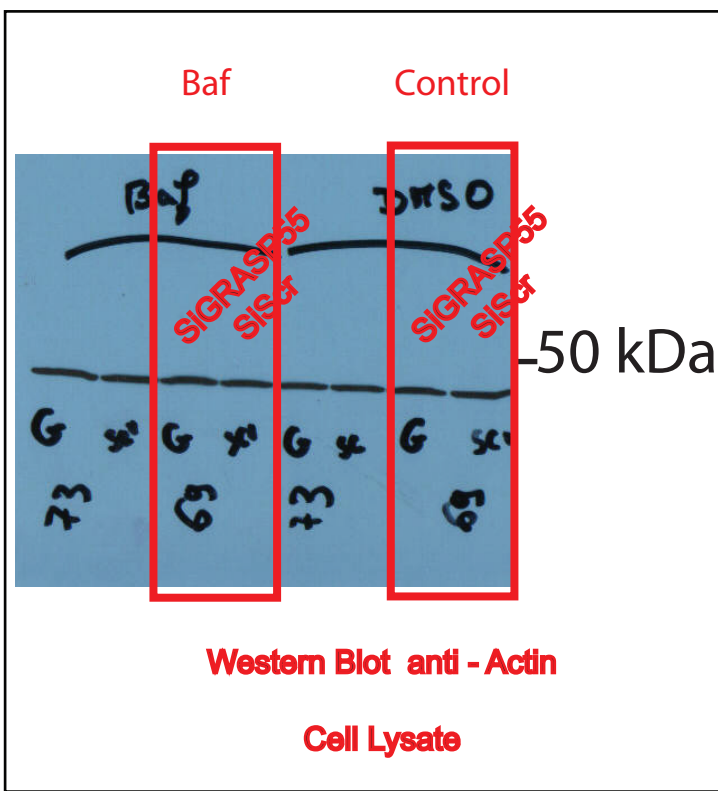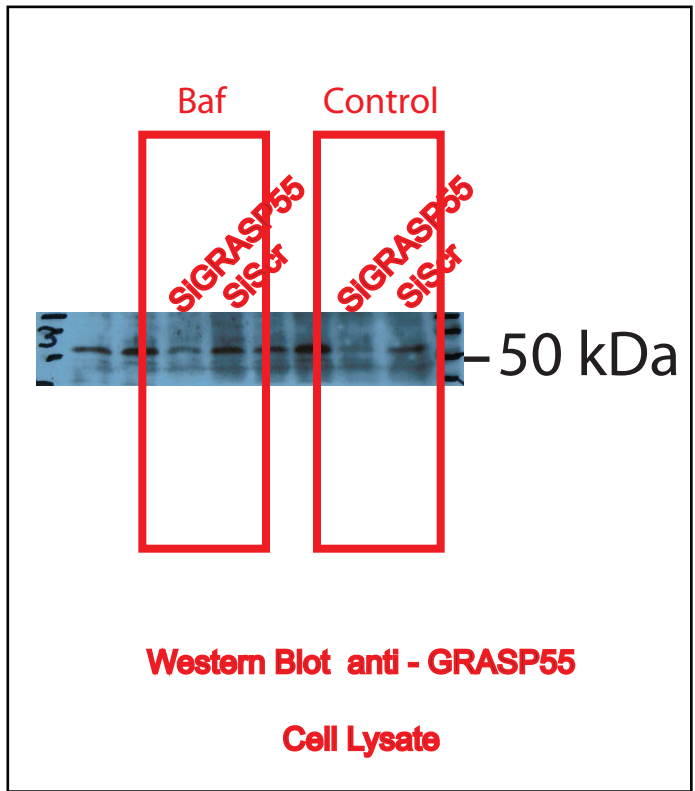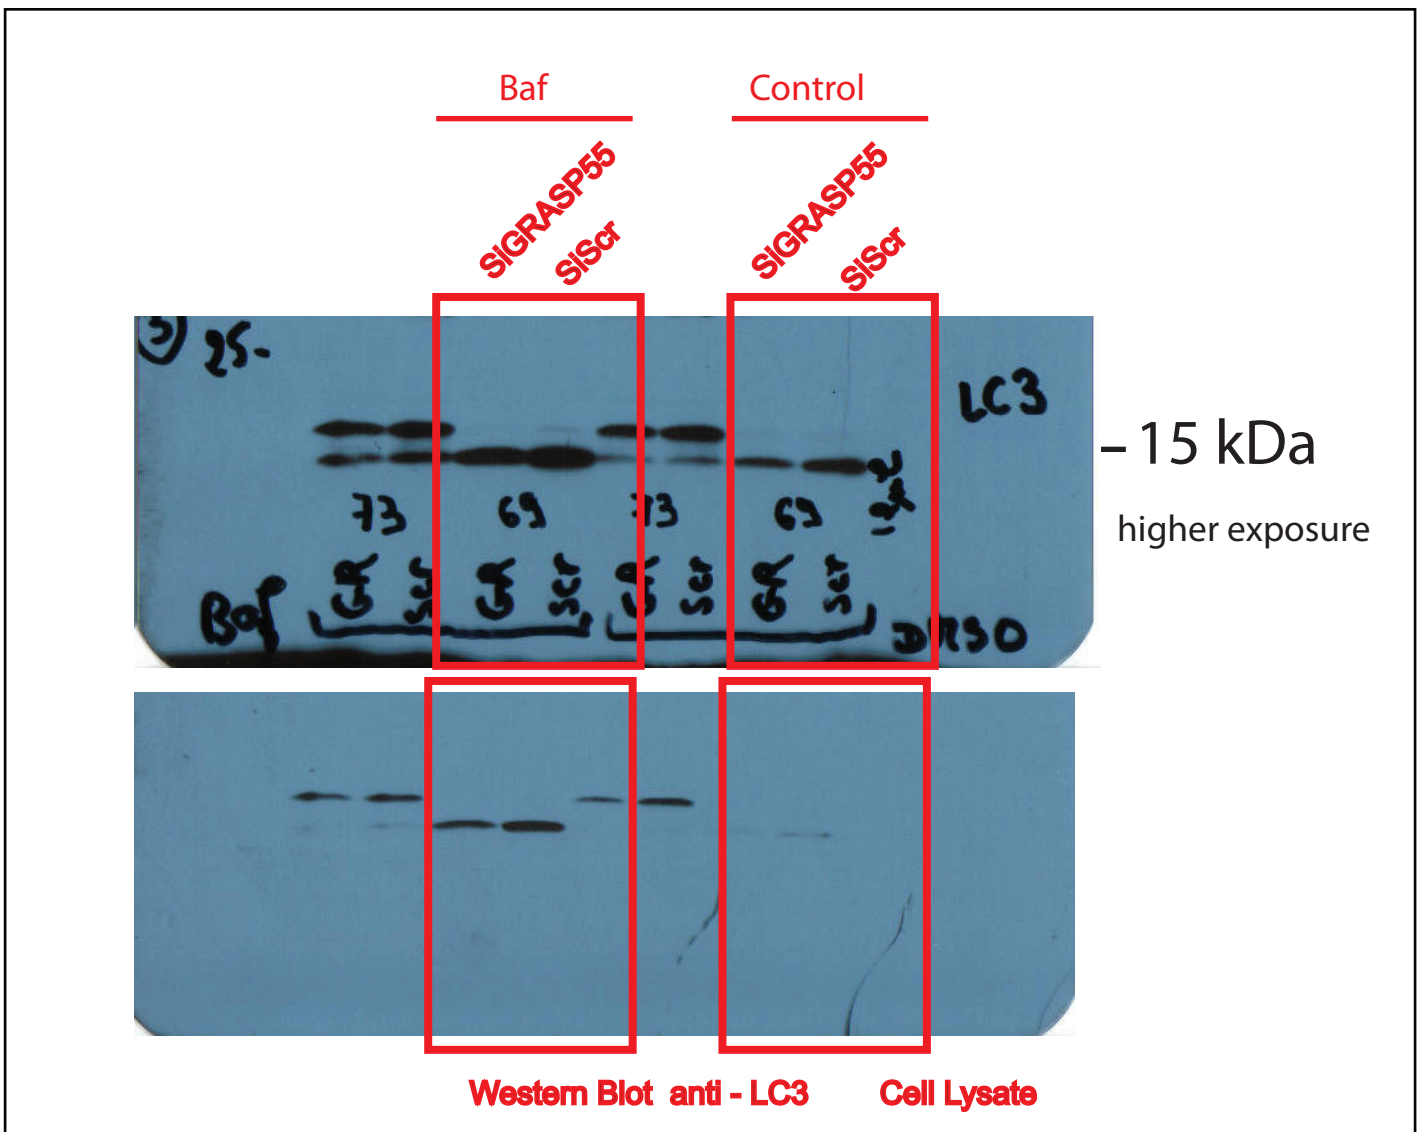

Figure 5A

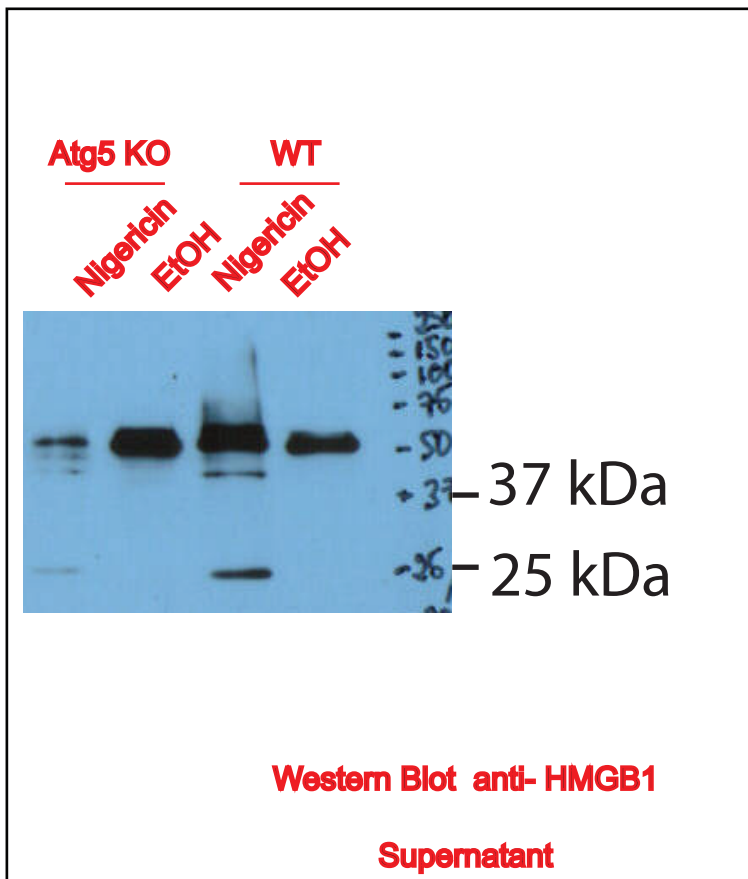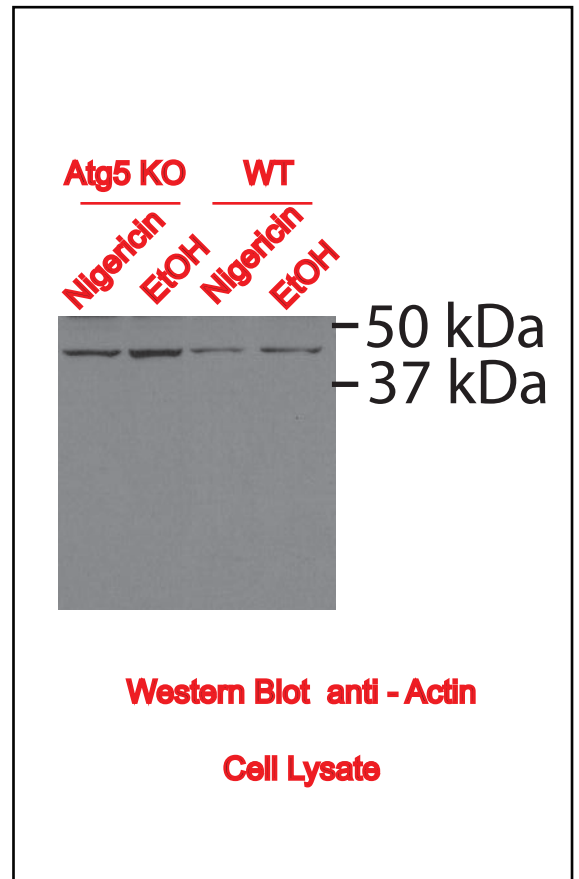

Figure 6B
